# Supplementary material for: A cross-country qualitative study on contraceptive method mix: contraceptive decisionmaking among youth
Source: PubMed Central journal article supplement (PMC8145785; doi:10.1186/s12978-021-01160-5), 2021-05-25
Supplement: 12978_2021_1160_MOESM1_ESM.pdf [file 12978_2021_1160_MOESM1_ESM.pdf]

## Study Regions in Each Country

|         | <b>Capital</b> | <b>Subnational entity with poor youth SRH outcomes</b> | <b>Subnational entity with strong youth SRH outcomes</b> |
|---------|----------------|--------------------------------------------------------|----------------------------------------------------------|
| Kenya   | Nairobi        | Narok County                                           | Embu County                                              |
| Nigeria | Abuja          | Cross River State                                      | Anambra State                                            |
| Uganda  | Kampala        | Mayuge District                                        | Kabale District                                          |

Note: SRH outcomes used to select subnational entities included teenage pregnancy rate, total fertility rate, median age at first birth, and median age at first sexual intercourse. The team also took geographic accessibility and U.S. Department of State travel restrictions into consideration. The study team assessed SRH outcomes based on the breakdown of data in each country's most recent Demographic and Health Survey (DHS). While Uganda is divided administratively into 112 districts, the DHS groups them into 15 regions. The study team then selected a single district within each region to ensure data collection was contained within an official governing zone.
